# Supplementary material for: Chalcogenide-bridged ditungsten (M–M) complexes: an experimental and theoretical study of the electronic structure and bonding in W2(μ-E)(μ-OCH2tBu)2(OCH2tBu)6, where E = O, S, Se or Te†
Source: Royal Society of Chemistry journal article supplement (doi:10.1039/b101346g), 2001-01-01
Supplement: b101346g.doc [file b101346g.doc]

# Supporting Information

Crystallographic Data for the compounds W2(-E)(-OCH2tBu)2(OCH2tBu)6, where E = O, S, Se, or Te.

Selected bond distances (Å)

| Bond | Distance | Distance | Distance | Distance |
| --- | --- | --- | --- | --- |
|  | -O | -S | -Se | -Te |
| W-W | 2.5509(4) | 2.628(1) | 2.6414(7) | 2.662(1) |
| W(1)-O(22) | 1.857(4) | 1.888(3) | 1.886(6) | 1.917(8) |
| W(1)-O(28) | 1.908(1) | 1.878(3) | 1.876(5) | 1.919(8) |
| W(1)-O(16) | 1.932(2) | 1.938(3) | 1.933(6) | 1.947(7) |
| W(1)-E(3) | 1.956(2) | 2.356(2) | 2.4847(8) | 2.694(1) |
| W(1)-O(10) | 2.096(1) | 2.090(3) | 2.075(5) | 2.078(8) |
| W(1)-O(4) | 2.117(4) | 2.081(3) | 2.090(4) | 2.072(8) |
| W(2)-O(40) | 1.865(2) | 1.874(2) | 1.873(6) | 1.905(8) |
| W(2)-O(46) | 1.910(3) | 1.874(5) | 1.875(4) | 1.913(8) |
| W(2)-O(34) | 1.925(3) | 1.936(3) | 1.941(5) | 1.942(7) |
| W(2)-E(3) | 1.961(2) | 2.355(2) | 2.486(8) | 2.695(1) |
| W(2)-O(10) | 2.070(3) | 2.096(4) | 2.078(4) | 2.116(8) |
| W(2)-O(4) | 2.134(2) | 2.094(2) | 2.079(5) | 2.054(8) |

Selected bond angles (º).

| Bonds | Angle | Angle | Angle | Angle |
| --- | --- | --- | --- | --- |
|  | -O | -S | -Se | -Te |
| W(1)-E(3)-W(2) | 81.28(1) | 67.82(5) | 61.21(2) | 59.20(3) |
| E(3)-W(1)-O(16) | 165.1(1) | 178.5(1) | 178.3(2) | 176.7(2) |
| E(3)-(W2)-O(34) | 164.7(1) | 179.2(1) | 178.0(2) | 177.1(2) |
| O(22)-W(1)O(28) | 103.22(1) | 103.2(1) | 102.6(2) | 102.5(3) |
| O(40)-W(2)-O(46) | 101.4(1) | 102.2(2) | 102.5(2) | 104.1(3) |
| O(4)-W(1)-O(10) | 75.8(1) | 75.0(1) | 74.7(2) | 73.9(3) |
| O(4)-W(2)-O(10) | 76.0(1) | 74.6(1) | 74.8(2) | 73.5(3) |
| E(3)-W(1)-O(22) | 92.61(1) | 91.1(1) | 90.9(1) | 89.8(2) |
| E(3)-W(1)-O(28) | 86.2(1) | 91.6(1) | 91.4(2) | 90.9(3) |
| E(3)-W(2)-O(40) | 94.49(9) | 91.5(1) | 90.6(2) | 90.3(2) |
| E(3)-W(2)-O(46) | 84.9(1) | 91.6(1) | 91.0(1) | 90.5(3) |

Ground State DFT Vertical Excitation Energies

| DFT Calculated Transition Energies | | | | | |
| --- | --- | --- | --- | --- | --- |
| W2(-O)(-OCH3)2(OCH3)6 | E/eV | /nm | W2(-S)(-OCH3)2(OCH3)6 | E/eV | /nm |
| HOMO  LUMO | 3.54 | 349 | HOMO  LUMO | 3.42 | 361 |
| HOMO  LUMO+1 | 3.63 | 340 | HOMO  LUMO+1 | 3.46 | 357 |
| HOMO  LUMO+2 | 3.65 | 339 | HOMO  LUMO+2 | 3.76 | 329 |
| HOMO  LUMO+3 | 3.76 | 329 | HOMO  LUMO+3 | 3.90 | 217 |
| HOMO  LUMO+4 | 4.40 | 281 | HOMO  LUMO+4 | 4.30 | 288 |
| HOMO-1  LUMO | 5.22 | 237 | HOMO-1  LUMO | 4.54 | 272 |
| W2(-Se)(-OCH3)2(OCH3)6 | E/eV | /nm | W2(-Te)(-OCH3)2(OCH3)6 E/eV | | /nm |
| HOMO  LUMO | 3.35 | 369 | HOMO  LUMO | 3.25 | 381 |
| HOMO  LUMO+1 | 3.53 | 351 | HOMO  LUMO+1 | 3.52 | 352 |
| HOMO  LUMO+2 | 3.71 | 333 | HOMO  LUMO+2 | 3.70 | 334 |
| HOMO  LUMO+3 | 3.88 | 319 | HOMO  LUMO+3 | 3.91 | 316 |
| HOMO  LUMO+4 | 4.19 | 295 | HOMO  LUMO+4 | 4.15 | 298 |
| HOMO-1  LUMO | 4.03 | 307 | HOMO-1  LUMO | 3.53 | 351 |
